# Supplementary material
Source: PubMed Central journal article supplement (PMC3748358)

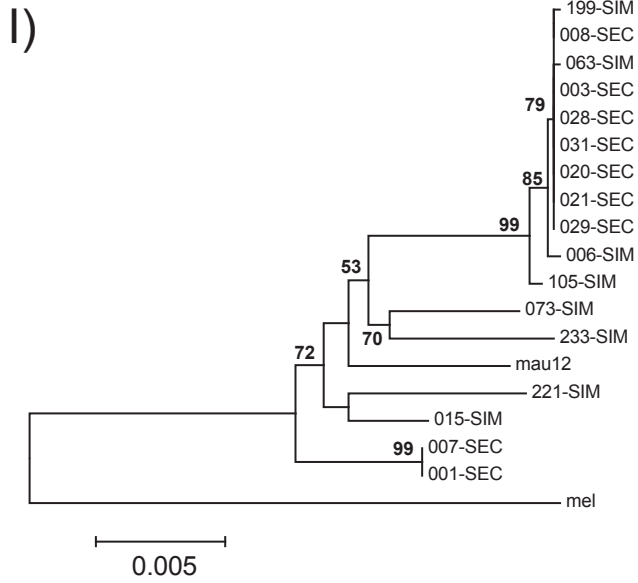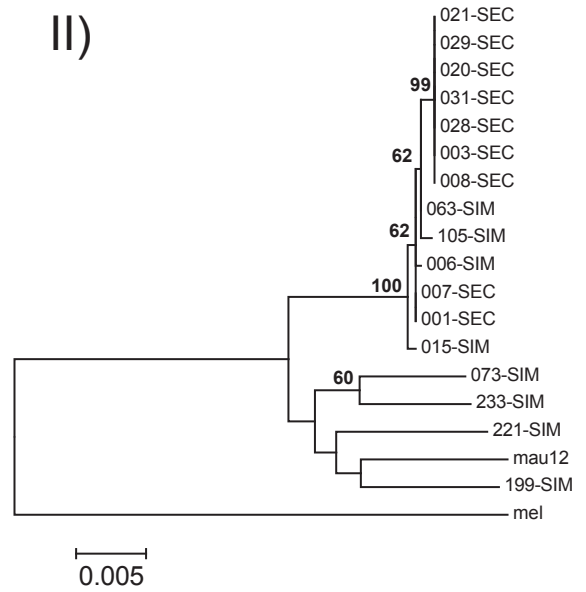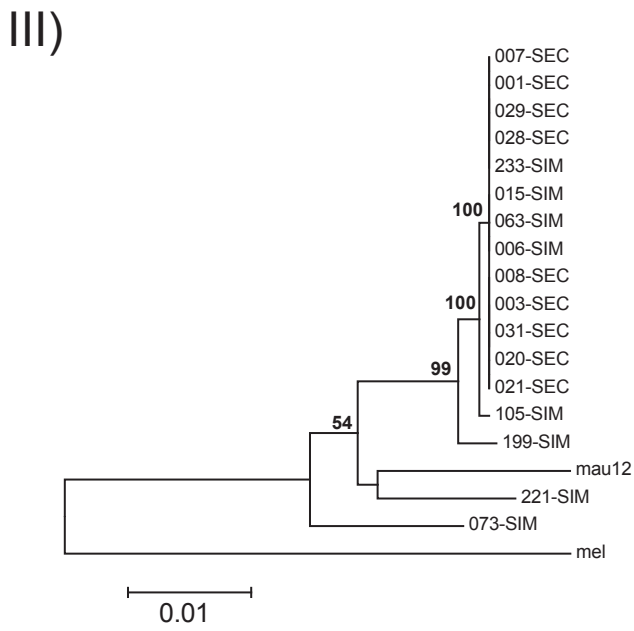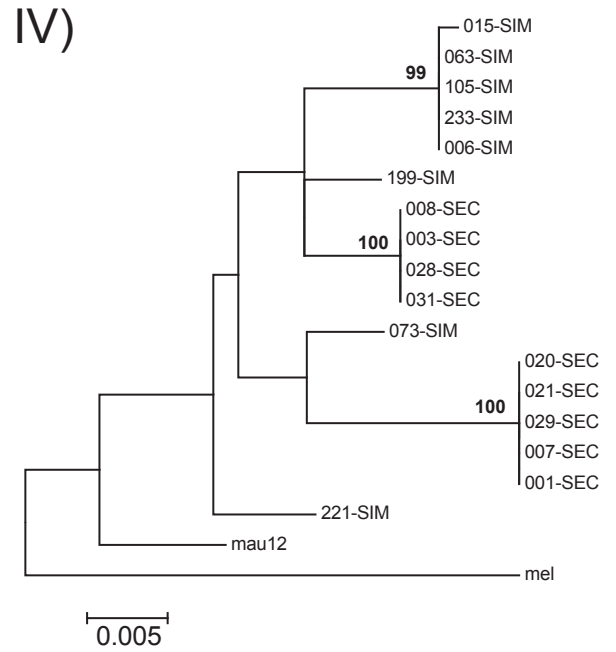

Supplement: supp_mst123_FigureS1.pdf [file supp_mst123_FigureS1.pdf]
